# Supplementary material for: The influence of frozen-thawed and fresh embryo transfer on utero-placental (vascular) development: the Rotterdam Periconception cohort
Source: PubMed Central journal article supplement — Hum Reprod. 2021 May 11;36(8):2091–100. doi: 10.1093/humrep/deab070 (PMC8289318; doi:10.1093/humrep/deab070), 2021-05-11
Supplement: deab070_supplementary_figure_s1.pdf [file deab070_supplementary_figure_s1.pdf]

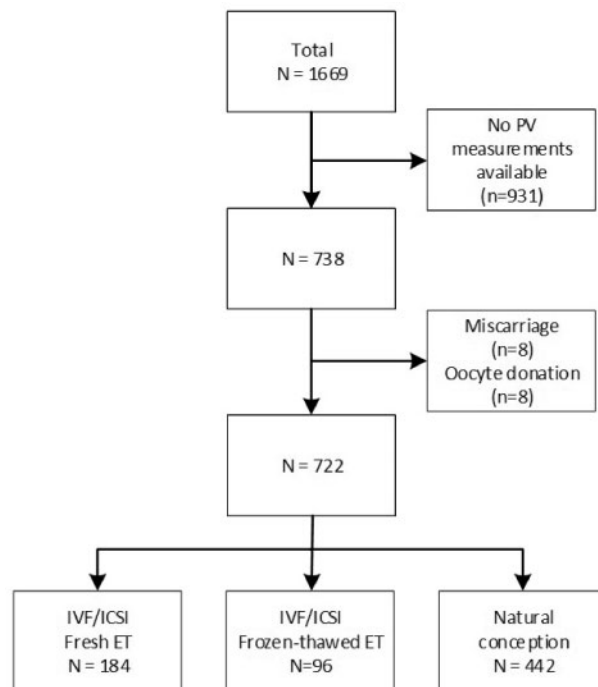

**Supplementary Figure S1.** Flowchart of the Rotterdam Periconception cohort. PV, placental volume; ET, embryo transfer.
