# Supplementary material for: The influence of frozen-thawed and fresh embryo transfer on utero-placental (vascular) development: the Rotterdam Periconception cohort
Source: PubMed Central journal article supplement — Hum Reprod. 2021 May 11;36(8):2091–100. doi: 10.1093/humrep/deab070 (PMC8289318; doi:10.1093/humrep/deab070), 2021-05-11
Supplement: deab070_supplementary_table_si.pdf [file deab070_supplementary_table_si.pdf]

**Supplementary Table S1** Baseline characteristics of the total cohort population stratified for the mode of conception.

|                                    | IVF/ICSI<br>Frozen-thawed ET n = 96 |           | IVF/ICSI<br>Fresh ET n = 184 |           | Natural conception<br>n = 442 |           | P-value                          | Missing |
|------------------------------------|-------------------------------------|-----------|------------------------------|-----------|-------------------------------|-----------|----------------------------------|---------|
|                                    | Median/N                            | IQR/%     | Median/N                     | IQR/%     | Median/N                      | IQR/%     |                                  |         |
| <u>Maternal</u>                    |                                     |           |                              |           |                               |           |                                  |         |
| Age, years                         | 33.3                                | 30.1–36.4 | 33.2                         | 30.7–36.6 | 31.3                          | 28.7–34.8 | <b>&lt;0.001<sup>d,e</sup></b>   | 1       |
| Body mass index, kg/m <sup>2</sup> | 24.1                                | 21.8–27.2 | 23.9                         | 21.7–27.6 | 24.9                          | 22.2–29.0 | <b>0.018<sup>d</sup></b>         | 30      |
| MAP, mmHg                          | 80.0                                | 75.0–86.3 | 80.0                         | 76.0–86.0 | 80.0                          | 76.7–86.7 | 0.530                            | 30      |
| Nullipara                          | 61                                  | 63.5      | 138                          | 75.4      | 192                           | 43.6      | <b>&lt;0.001<sup>c,d,e</sup></b> | 3       |
| Geographical origin, Western       | 74                                  | 77.1      | 161                          | 87.5      | 376                           | 85.1      | 0.066                            | 0       |
| Education                          |                                     |           |                              |           |                               |           | 0.597                            | 17      |
| Low                                | 4                                   | 4.3       | 16                           | 8.9       | 37                            | 8.5       |                                  |         |
| Middle                             | 36                                  | 38.7      | 60                           | 33.5      | 142                           | 32.8      |                                  |         |
| High                               | 103                                 | 57.5      | 53                           | 57.0      | 254                           | 58.2      |                                  |         |
| Alcohol, yes <sup>a</sup>          | 27                                  | 29.0      | 37                           | 20.6      | 158                           | 37.1      | <b>&lt;0.001<sup>e</sup></b>     | 23      |
| Smoking, yes <sup>a</sup>          | 12                                  | 12.9      | 28                           | 15.4      | 72                            | 16.9      | 0.629                            | 22      |
| Folic acid, yes <sup>b</sup>       | 89                                  | 95.7      | 176                          | 98.9      | 314                           | 73.2      | <b>&lt;0.001<sup>d,e</sup></b>   | 22      |
| Fertilisation method, ICSI         | 38                                  | 39.6      | 103                          | 56.3      | NA                            |           | <b>0.008</b>                     | 1       |

IQR, interquartile range. MAP, mean arterial pressure. Statistically significant values are in bold.

<sup>a</sup>Any use during the 14 weeks prior to up to 10 weeks of gestation.

<sup>b</sup>Daily use during the 14 weeks prior to up to 10 weeks of gestation.

<sup>c</sup>Significantly different between pregnancies after frozen-thawed ET and after fresh ET.

<sup>d</sup>Significantly different between pregnancies after frozen-thawed ET and naturally conceived pregnancies.

<sup>e</sup>Significantly different between pregnancies after fresh ET and naturally conceived pregnancies.
